# Supplementary material for: Planned Place of Birth—Impact of Psychopathological Risk Factors on the Choice of Birthplace and Its Postpartum Effect on Psychological Adaption: An Exploratory Study
Source: MDPI journal article supplement (doi:10.3390/jcm11020292), 2022-01-06
Supplement: s1 [file s1]

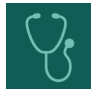

## Supplementary Materials

### Exploratory Factor Analysis of Birth Anxiety Scale (BAS)

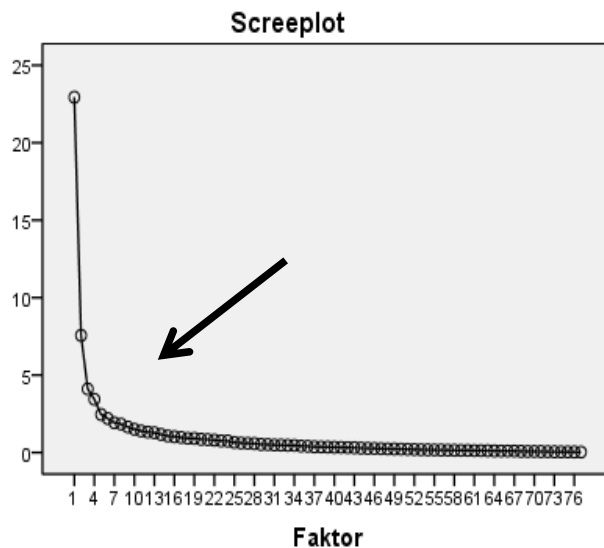

**Figure S1.** Screeplot for factor analysis: 3 latent factors were selected to keep.

**Table S1.** Factor loadings after exploratory factor analysis for Birth Anxiety Scale (BAS).

| Rotated component matrix                                                  |       |               |       |  |
|---------------------------------------------------------------------------|-------|---------------|-------|--|
| Items                                                                     | I     | Factors<br>II | III   |  |
| General Anxiety that birth is imminent                                    |       | 0.734         |       |  |
| Fear of gynaecological examinations (birth context)                       |       |               | 0.695 |  |
| Fear of gynaecological examinations in general (independent of pregnancy) |       |               | 0.785 |  |
| Fear of gynaecologist                                                     |       |               | 0.716 |  |
| Fear of gyn chair                                                         |       |               | 0.774 |  |
| Fear of going to and from the gyn chair                                   |       |               | 0.770 |  |
| Fear of undressing at the gynaecologist                                   |       |               | 0.736 |  |
| Fear of being looked at by the gynaecologist                              |       |               | 0.769 |  |
| Pain during examination                                                   |       |               | 0.580 |  |
| Injections                                                                | 0.563 |               |       |  |
| Surgical instruments                                                      | 0.622 |               |       |  |
| Open wounds on myself                                                     | 0.517 |               |       |  |
| Open wounds on others                                                     | 0.569 |               |       |  |
| Vomiting                                                                  |       |               |       |  |
| Nausea                                                                    |       | 0.403         |       |  |
| Fear of losing the child, i.e. having a miscarriage                       |       |               |       |  |
| Fear of unexpected or sudden onset of childbirth                          |       | 0.674         |       |  |
| Fear of the beginning of labor                                            |       | 0.820         |       |  |

| Rotated component matrix                                         |       |               |       |
|------------------------------------------------------------------|-------|---------------|-------|
| Items                                                            | I     | Factors<br>II | III   |
| Departure from home to birth place                               |       | 0.666         |       |
| Entering the birth place                                         |       | 0.456         |       |
| Entering the admission room                                      | 0.422 | 0.414         |       |
| Noises in the hospital                                           | 0.608 |               |       |
| Sick people                                                      | 0.624 |               |       |
| Watching others getting an injection                             | 0.497 |               |       |
| Watching others getting prepared for birth process               | 0.510 |               |       |
| Vaginal examinations during birth process                        |       |               | 0.436 |
| Fear of taking medications yourself                              |       |               |       |
| Syringes and sharp objects such as knives, scissors and scalpels | 0.656 |               |       |
| Fear of contractions                                             |       | 0.756         |       |
| Fear of being touched                                            |       |               | 0.564 |
| Injections for birth induction                                   | 0.648 |               |       |
| Iv drip for birth induction                                      | 0.616 |               |       |
| Waiting in admission room for birth                              | 0.530 |               |       |
| Getting an enema before birth                                    | 0.480 |               |       |
| Shaving and bathing                                              | 0.443 |               | 0.471 |
| Being brought to delivery room                                   | 0.554 |               |       |
| Fear of entering delivery room                                   | 0.567 | 0.407         |       |
| Fear of the bright lamps above the gynaecologist chair           | 0.595 |               | 0.411 |
| Fear of odors in delivery room                                   | 0.716 |               |       |
| Fear of noises in delivery room                                  | 0.768 |               |       |
| Instruments and equipment in delivery room                       | 0.797 |               |       |
| Fear of the medical doctors in delivery room                     | 0.649 |               | 0.525 |
| Fear of young medical doctors                                    | 0.540 |               | 0.485 |
| Fear of nurses                                                   | 0.487 |               | 0.582 |
| Fear of midwives                                                 |       |               | 0.505 |
| fear of unfriendly and impatient people in the delivery room     | 0.437 |               |       |
| Mass processing and routine treatment                            | 0.523 |               |       |
| Fear of fear of rupture of membranes                             |       | 0.628         |       |
| Of long duration of birth                                        |       | 0.727         |       |
| Of complications                                                 |       | 0.675         |       |
| Fear of not being able to endure the effort                      |       | 0.764         |       |
| Fear of the expulsion period                                     |       | 0.771         |       |
| Fear of losing urine and flatulences when pressing               |       | 0.675         |       |
| Fear of pain                                                     |       | 0.796         |       |
| Fear of blood of yourself                                        | 0.422 | 0.434         |       |
| Fear of blood of others                                          | 0.559 |               |       |
| Fear of being left alone                                         |       |               |       |
| Fear of losing self-control                                      |       | 0.528         |       |
| Fear of losing nerves                                            |       | 0.644         |       |
| Fear of hearing yourself screaming                               |       | 0.551         |       |
| Fear of hearing others screaming                                 | 0.437 |               |       |
| Fear of being poorly prepared for birth                          |       | 0.585         |       |
| Fear of not being educated enough about the birth process        |       | 0.571         |       |
| Fear of being looked at by people standing around                | 0.417 |               | 0.422 |
| Fear of Anesthesia                                               | 0.758 |               |       |
| Fear of cesarean section                                         | 0.634 |               |       |
| Fear of being seen half naked by others during birth             |       |               | 0.484 |

| Rotated component matrix                             |  |         |       |       |
|------------------------------------------------------|--|---------|-------|-------|
| Items                                                |  | Factors |       |       |
|                                                      |  | I       | II    | III   |
| Fear of not knowing what is happening to you and why |  | 0.426   |       |       |
| Fear of feeling oppressed                            |  | 0.401   | 0.482 | 0.403 |
| Fear of episiotomy                                   |  |         | 0.466 |       |
| Fear of the suture of an episiotomy                  |  | 0.423   | 0.440 |       |
| Feeling of hopelessness                              |  | 0.463   | 0.430 |       |
| Fear of your own death                               |  |         |       |       |
| Fear of being exposed                                |  |         |       |       |
| Fear of afterbirth                                   |  |         | 0.518 |       |
| Fear of the first sight of the child                 |  |         |       |       |
| Fear of congenital anomalies                         |  |         | 0.553 |       |

Note: Exploratory factor analysis was performed by administering 77-items questionnaire to 177 study participants. The Kaiser–Meyer–Olkin measure of sampling adequacy was .85, representing a relatively good factor analysis, and Bartlett's test of Sphericity was significant ( $p<0.001$ ), indicating that correlations between items were sufficiently large for performing an EFA. Using scree-plot 3 latent factors were selected to keep, which accounted for 44.95% of the total variance. Factor I was interpreted as „fear of medical procedures and clinical environment“, Factor II as „fear of birth and beginning of birth“ and Factor III as „fear of physical contact and palpations“.

**Table S2:** Background characteristics in  $n$  (%) and drop-out-analysis

| Variables                                 | Total       | Drop-outs  | Completer   | Test stat.  | $p$     |
|-------------------------------------------|-------------|------------|-------------|-------------|---------|
| parity                                    |             |            |             | $X^2=5.12$  | 0.009** |
| primipara                                 | 71 (35.3%)  | 11 (44.0%) | 60 (34.1%)  |             |         |
| multipara                                 | 130 (64.7%) | 14 (56.0%) | 116 (65.9%) |             |         |
| marital status                            |             |            |             | $X^2=3.39$  | 0.51    |
| married                                   | 80 (39.6%)  | 7 (28.0%)  | 73 (41.2%)  |             |         |
| permanent relationship                    | 114 (56.4%) | 17 (68.0%) | 97 (54.8%)  |             |         |
| single                                    | 6 (3.0%)    | 1 (4.0%)   | 5 (2.8%)    |             |         |
| living separately                         | 1 (0.5%)    | -          | 1 (0.6%)    |             |         |
| other                                     | 1 (0.5%)    | -          | 1 (0.6%)    |             |         |
| education level                           |             |            |             | $X^2=19.98$ | 0.001** |
| middle-school till 9 <sup>th</sup> grade  | 6 (3.0%)    | 4 (16.0%)  | 2 (1.1%)    |             |         |
| middle-school till 10 <sup>th</sup> grade | 48 (23.8%)  | 10 (40.0%) | 38 (21.5%)  |             |         |
| high-school diploma                       | 83 (41.0%)  | 7 (28.0%)  | 76 (43.0%)  |             |         |
| university and master                     | 62 (30.7%)  | 3 (12.0%)  | 59 (33.3%)  |             |         |
| other                                     | 3 (1.5%)    | 1 (4.0%)   | 2 (1.1%)    |             |         |
| occupation                                |             |            |             | $X^2=1.88$  | 0.94    |
| employed                                  | 156 (77.2%) | 20 (80.0%) | 136 (76.8%) |             |         |
| unemployed                                | 13 (6.4%)   | 2 (8.0%)   | 11 (6.2%)   |             |         |
| housewife                                 | 7 (3.5%)    | 1 (4.0%)   | 6 (3.4%)    |             |         |
| in education                              | 18 (8.9%)   | 1 (4.0%)   | 17 (9.6%)   |             |         |
| other                                     | 8 (4.0%)    | 1 (4.0%)   | 7 (4.0%)    |             |         |
| combined family income (per annum)        |             |            |             | $X^2=11.9$  | 0.02    |
| <6000€                                    | 7 (3.5%)    | 2 (8.0%)   | 5 (2.9%)    |             |         |
| 6000-12000€                               | 25 (12.5%)  | 5 (20.0%)  | 20 (11.4%)  |             |         |
| 12000-18000€                              | 31 (15.5%)  | 5 (20.0%)  | 26 (14.9%)  |             |         |

| Variables                             | Total      | Drop-outs  | Completer  | Test stat.           | <i>p</i> |
|---------------------------------------|------------|------------|------------|----------------------|----------|
| 18000-24000€                          | 39 (19.5%) | 8 (32.0%)  | 31 (17.7%) |                      |          |
| 24000-36000€                          | 58 (29.0%) | 2 (8.0%)   | 56 (32.0%) |                      |          |
| >36000€                               | 40 (20.0%) | 3 (17.0%)  | 37 (21.1%) |                      |          |
| satisfaction with financial situation |            |            |            | X <sup>2</sup> =6.21 | 0.09     |
| satisfied                             | 65 (32.3%) | 5 (20.0%)  | 60 (34.1%) |                      |          |
| rather satisfied                      | 44 (21.9%) | 10 (40.0%) | 34 (19.3%) |                      |          |
| rather unsatisfied                    | 81 (40.3%) | 8 (32.0%)  | 73 (41.5%) |                      |          |
| unzufrieden                           | 11 (5.5%)  | 2 (8.0%)   | 9 (5.1%)   |                      |          |

Note: X<sup>2</sup>= Fisher's exact test, *p*=*p*-value (\*\* *p*<0.01)

**Table S3.** Logistic Regression Model of Predictors of Planned Birthplace.

| Birthplace | Predictor | B     | <i>p</i> -Value | Odds Ratio | 95% Confidence Interval |             |
|------------|-----------|-------|-----------------|------------|-------------------------|-------------|
|            |           |       |                 |            | Lower Bound             | Upper Bound |
| FMU        | PDQ       | -0.13 | 0.001**         | 0.88       | 0.81                    | 0.95        |
|            | EPDS      | 0.07  | 0.19            | 1.08       | 0.97                    | 1.19        |
|            | BAS       | 0.01  | 0.08            | 1.01       | 0.99                    | 1.03        |
|            | CTQ       | 0.03  | 0.19            | 1.03       | 0.99                    | 1.07        |
|            | Parity    | 1.11  | 0.007**         | 3.04       | 1.35                    | 6.85        |
| HB         | PDQ       | -0.38 | 0.001**         | 0.69       | 0.55                    | 0.86        |
|            | EPDS      | -0.06 | 0.58            | 0.94       | 0.76                    | 1.16        |
|            | BAS       | 0.02  | 0.21            | 1.02       | 0.99                    | 1.04        |
|            | CTQ       | 0.14  | <0.001***       | 1.15       | 1.07                    | 1.23        |
|            | Parity    | 3.15  | 0.001**         | 23.29      | 3.89                    | 139.55      |

Note: A multinomial logistic regression model was conducted to estimate the association of prenatal distress, depressive symptoms, birth anxiety and childhood trauma (separate independent variables) with planned place of birth as dependent variable. The associations were adjusted for potentially confounding factors. All sociodemographic factors (covariate factors) were initially included, and the model was subsequently refined by removing those factors that were not significant (*p*>0.05) predictors of the outcome measure. Planned hospital birth was the reference category for these comparisons.

(OU=Obstetric Unit, FMU=Free-standing Midwifery Unit, HB=Homebirth, PDQ= Prenatal Distress Questionnaire (Cut-off≥22), EPDS=Edinburgh Postnatal Depression Scale (Cut-off ≥10–12=moderate; >12= high likelihood of a depression), BAS=Birth Anxiety Scale (Cut-off ≥126); CTQ=Childhood Trauma Questionnaire, B= coefficient, *p*-value (\*\* *p*<0.01; \*\*\**p*<0.001)).
